# Supplementary material for: TCR Convergence in Individuals Treated With Immune Checkpoint Inhibition for Cancer
Source: PubMed Central journal article supplement (PMC6962348; doi:10.3389/fimmu.2019.02985), 2020-01-09

# Supplemental Figure 1A

## Clonality values across Oncomine and Illumina-derived datasets

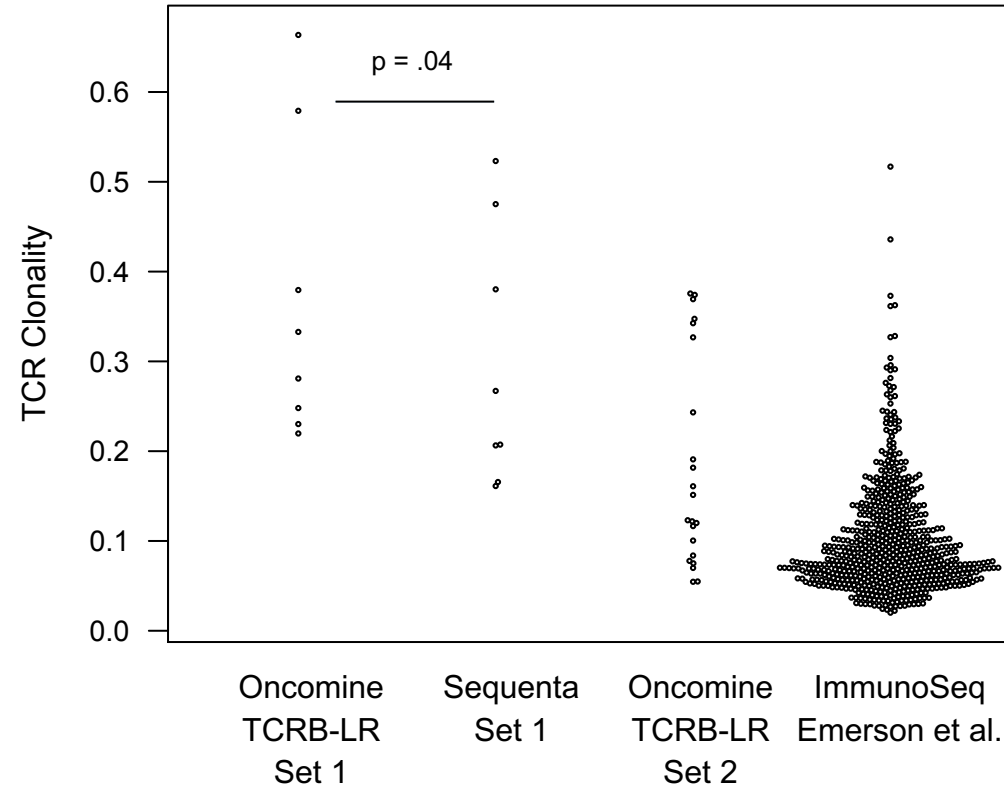

## TCR Convergence Across Datasets

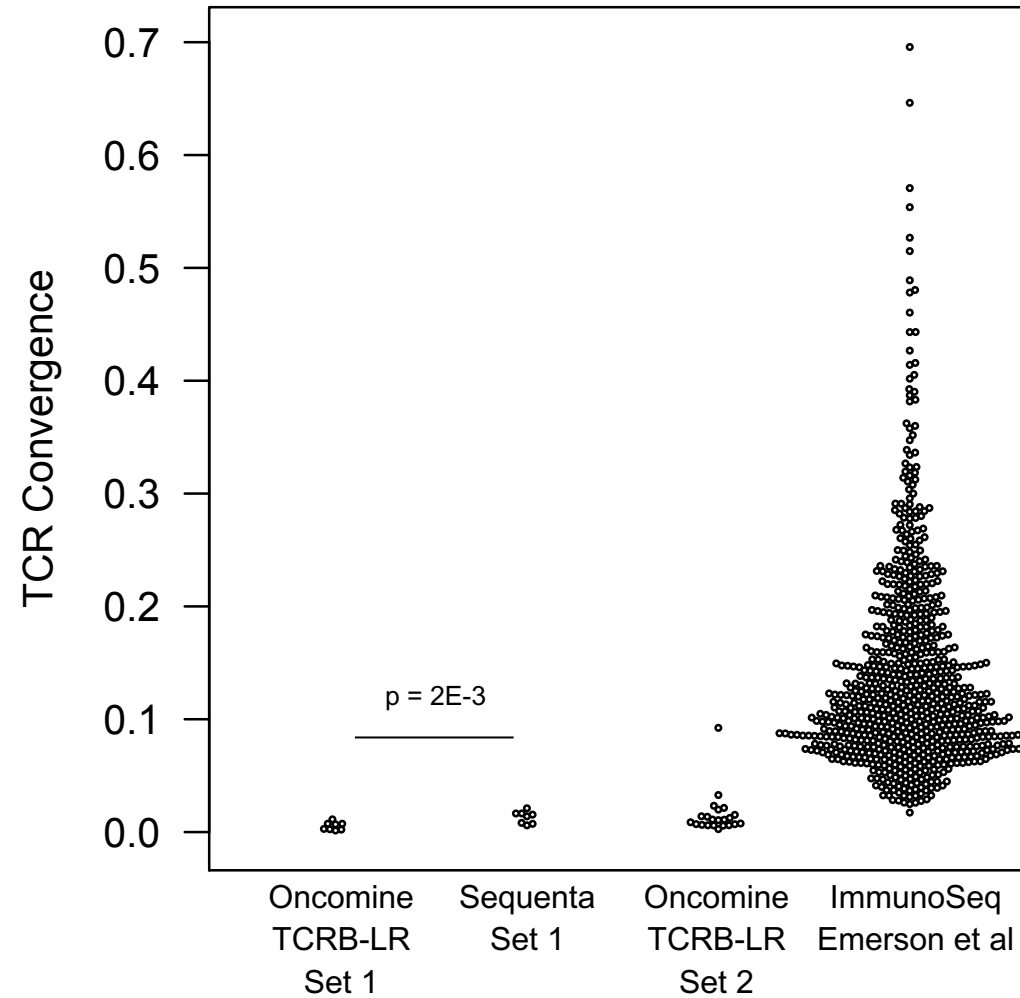

## TCR Clonality Versus Convergence in Emerson et al Dataset

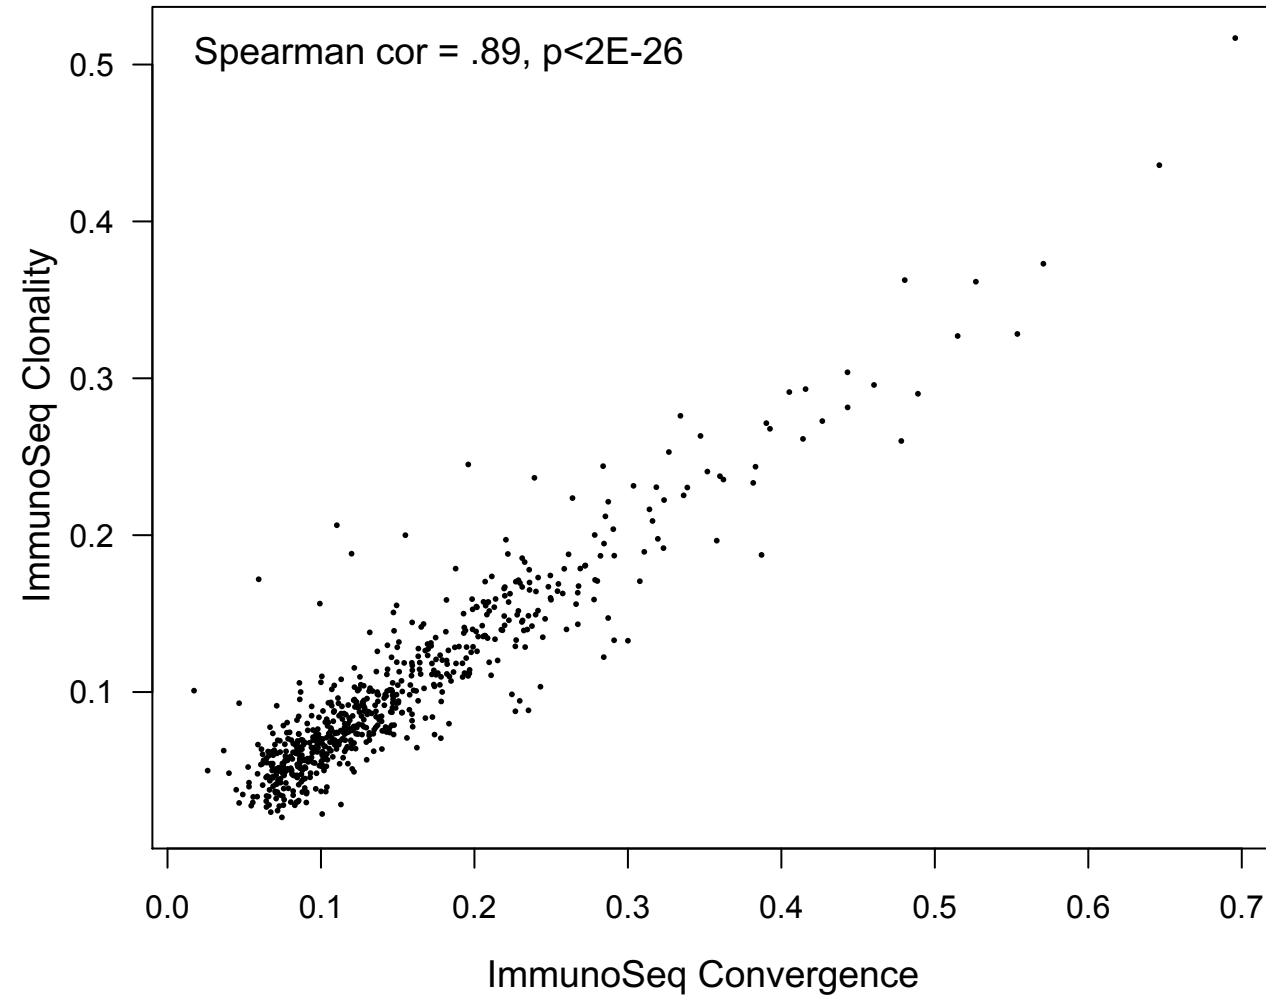

# Supplemental Figure 1D

## TCR Clonality Versus Convergence via Oncomine TCRB-LR Assay

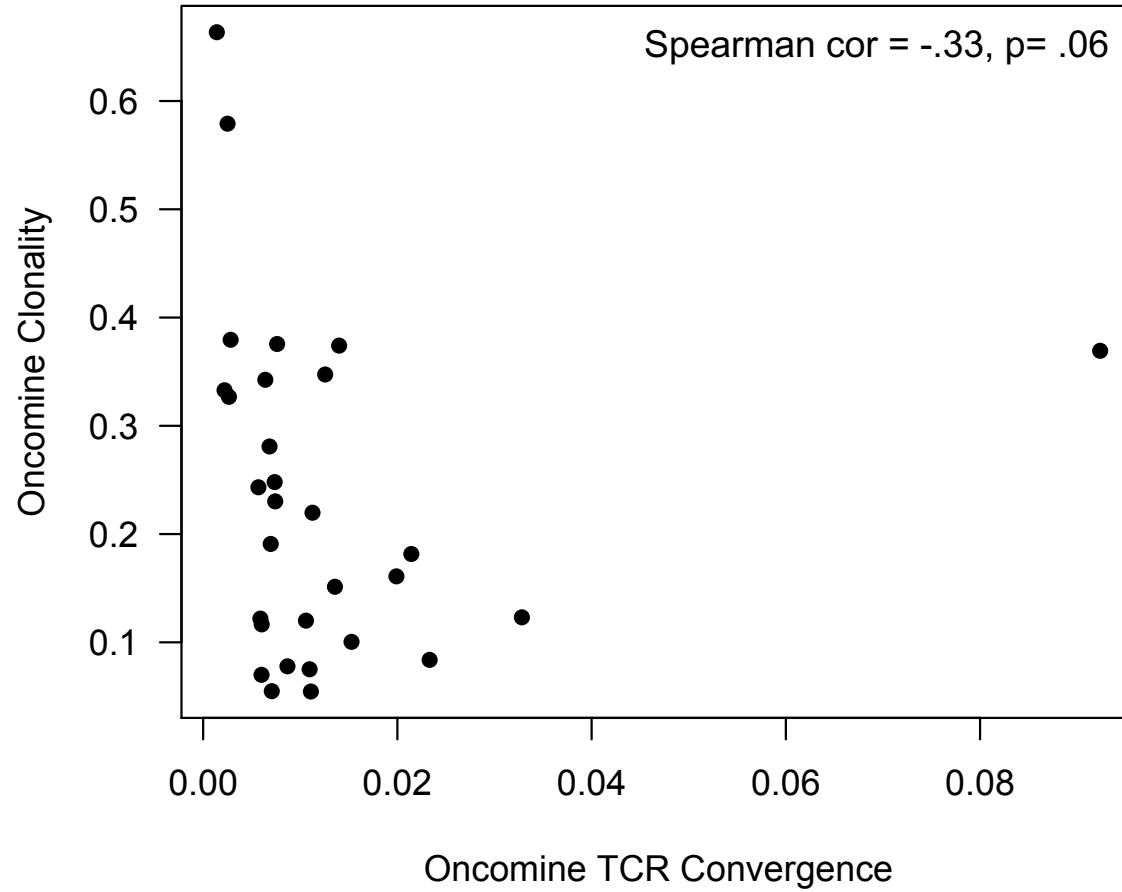

## Modeling ImmunoSeq Convergence Values by Residual Substitution Errors

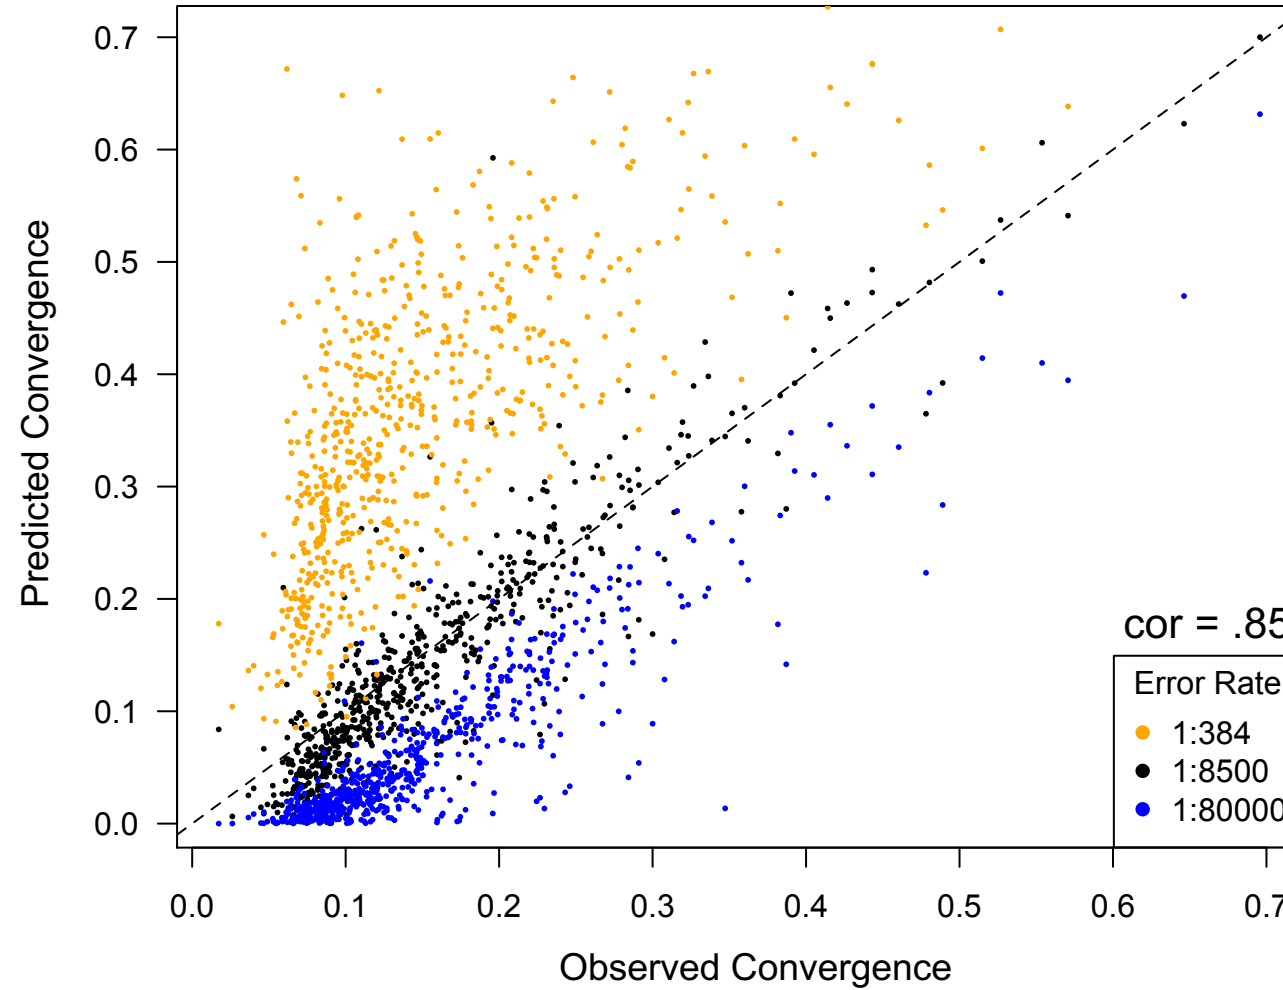

## Supplemental Table 2

|                     |        |      |
|---------------------|--------|------|
| Oncomine<br>TCRB-LR | 30     | 31   |
| ImmunoSeq<br>TCRB   | 55     | 84   |
|                     | Survey | Deep |

**Survey:** 2 PCR replicates sequenced to ~1M reads depth

**Deep:** 6 PCR replicates sequenced to ~1M reads depth

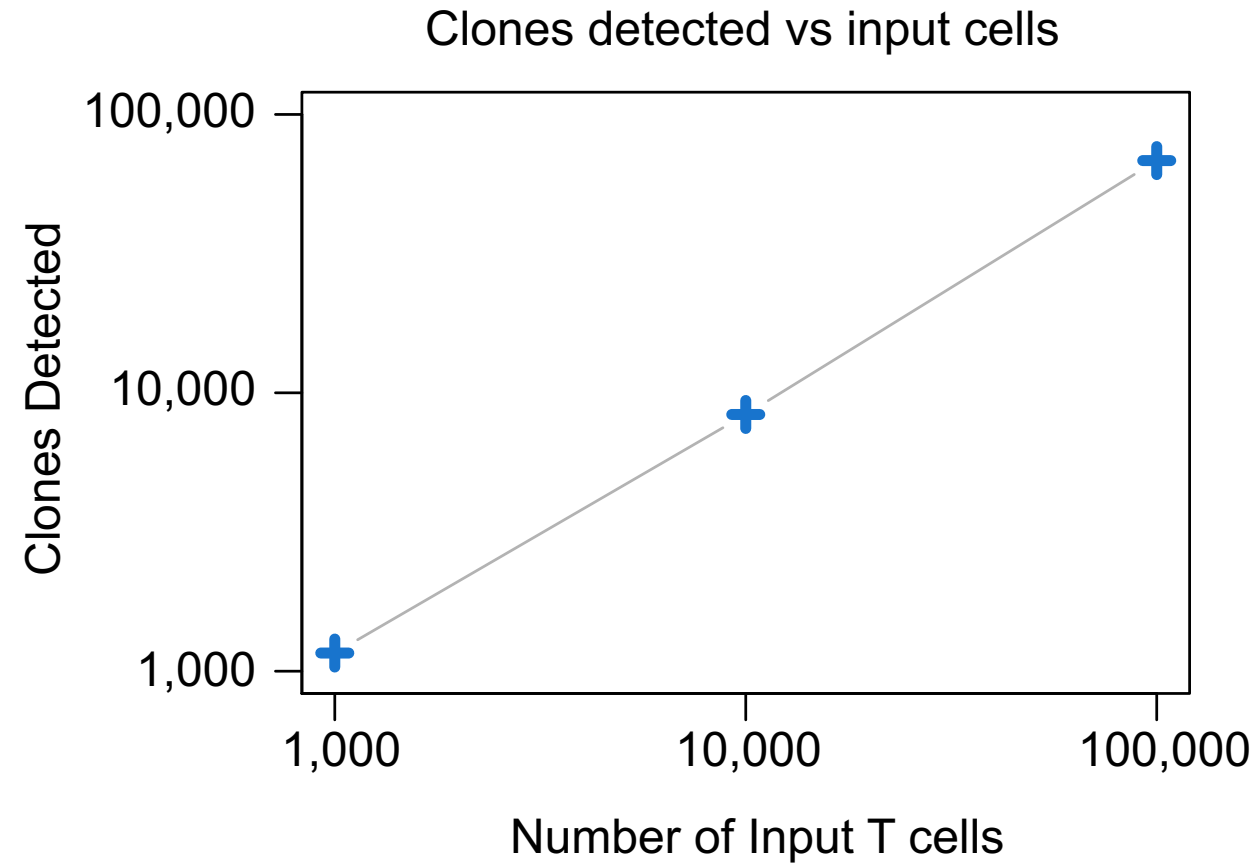

Supplement: Presentation_1.pdf [file Presentation_1.pdf]
